# Supplementary material for: Xiexin Tang improves the symptom of type 2 diabetic rats by modulation of the gut microbiota
Source: PubMed Central journal article supplement (PMC5829262; doi:10.1038/s41598-018-22094-2), 2018-02-27

**Xiexin Tang improves the symptom of type 2 diabetic rats by  
modulation of the gut microbiota**

Xiaoyan Wei, Jinhua Tao, Suwei Xiao, Shu Jiang\*, Erxin Shang, Zhenhua Zhu,

Dawei Qian, Jinao Duan\*\*

Jiangsu Collaborative Innovation Center of Chinese Medicinal Resources  
Industrialization, Nanjing University of Chinese Medicine, 138 Xianlin Road,  
Nanjing 210023, PR China

\*Corresponding author.

Prof. Shu Jiang

Jiangsu Collaborative Innovation Center of Chinese Medicinal Resources  
Industrialization, Nanjing University of Chinese Medicine, 138 Xianlin Road,  
Nanjing 210023, PR China

Tel. / fax: +86 25 85811516

\*Correspondence to these authors.

Prof. Jin-ao Duan

Jiangsu Collaborative Innovation Center of Chinese Medicinal Resources  
Industrialization, Nanjing University of Chinese Medicine, 138 Xianlin Road,  
Nanjing 210023, PR China

Tel / fax: +86 25 85811116

E-mail: [jiangshu2020@126.com](mailto:jiangshu2020@126.com) (S. Jiang); [dja@njutcm.edu.cn](mailto:dja@njutcm.edu.cn) (J.A. Duan)

**Figure S1.** Linear discriminant analysis (LDA) score of key genera of rats' gut microbiota in each group by LEfSe analysis. The higher the score was, the more important the role was. Only taxa meeting an LDA score threshold  $>2$  were listed. Blue = normal; Red = model; Green = Xiexin Tang,  $n = 5$ .

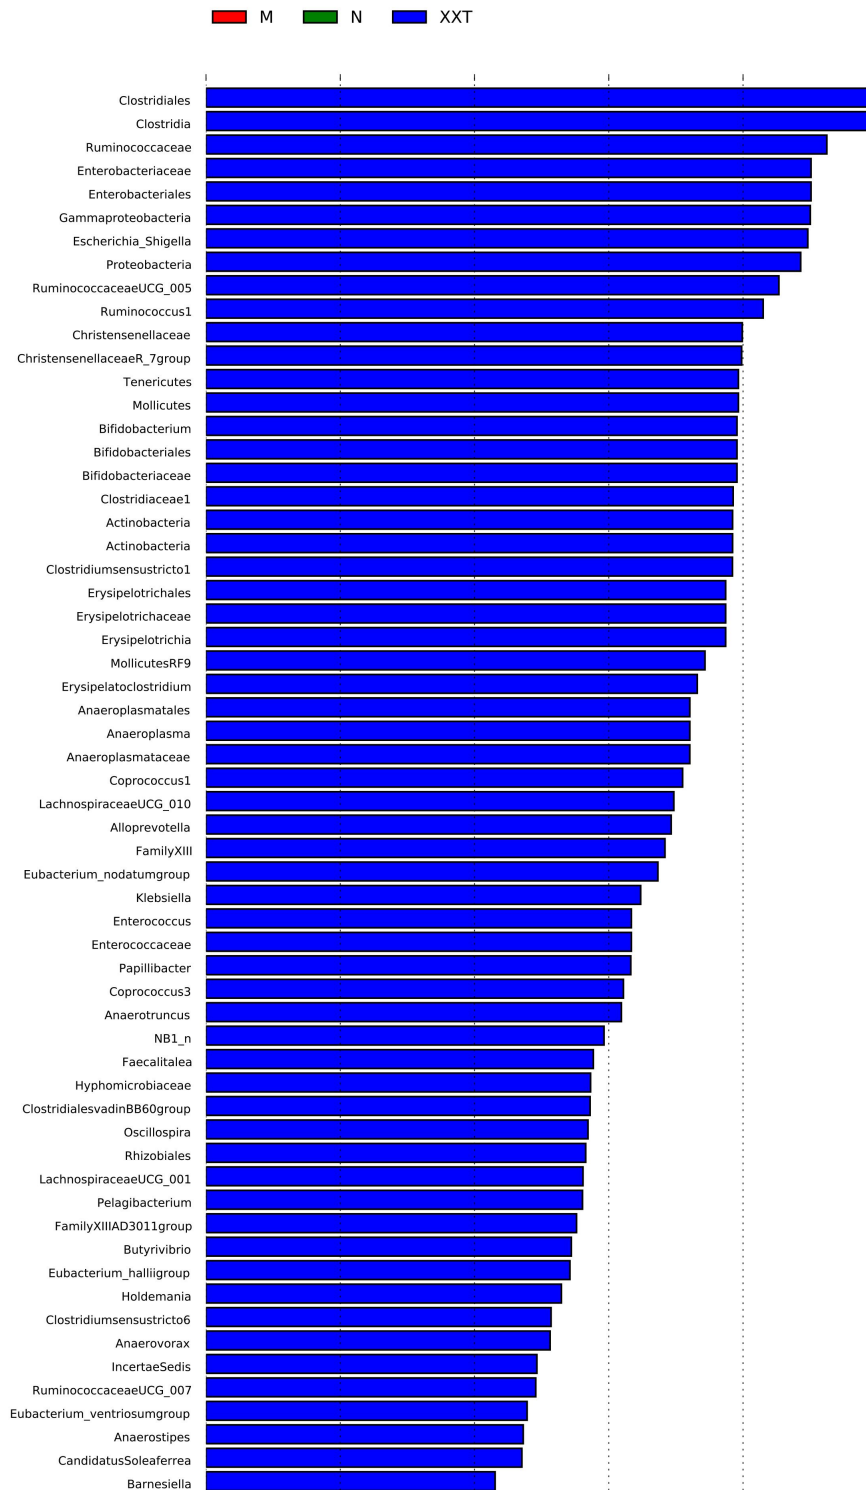

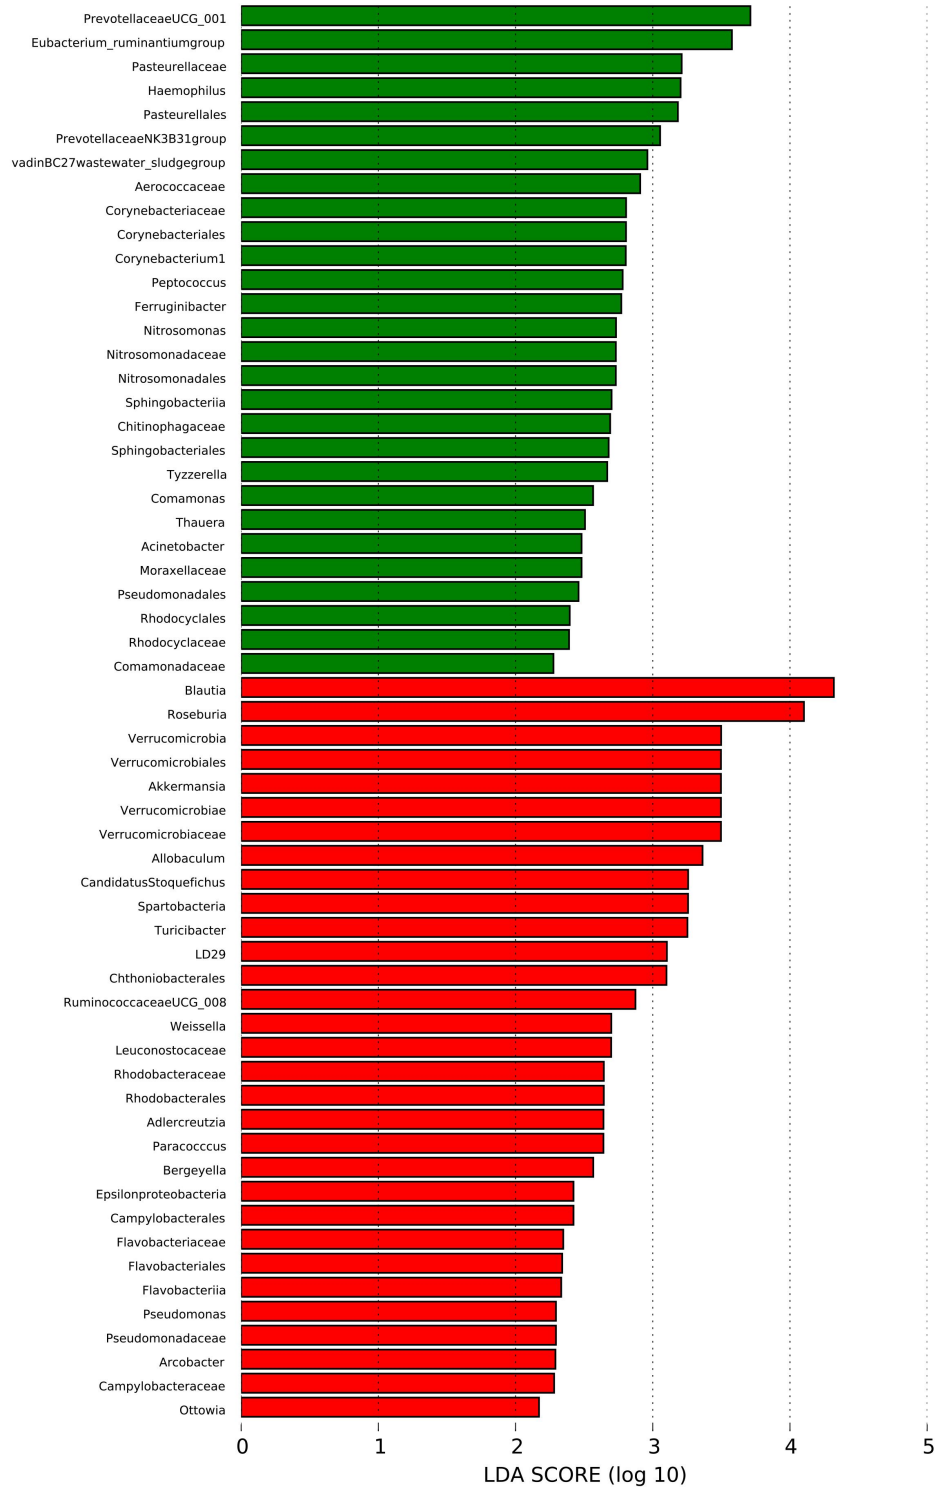

**Figure S2.** Gas chromatogram of short chain fatty acids. Peak identification: 1, acetic acid; 2, propionic acid; 3, isobutyric acid; 4, butyric acid; 5, 2-ethylbutyric acid. (A) standard mixture, (B) normal group, (C) T2DM group, (D) XXT-treated group.

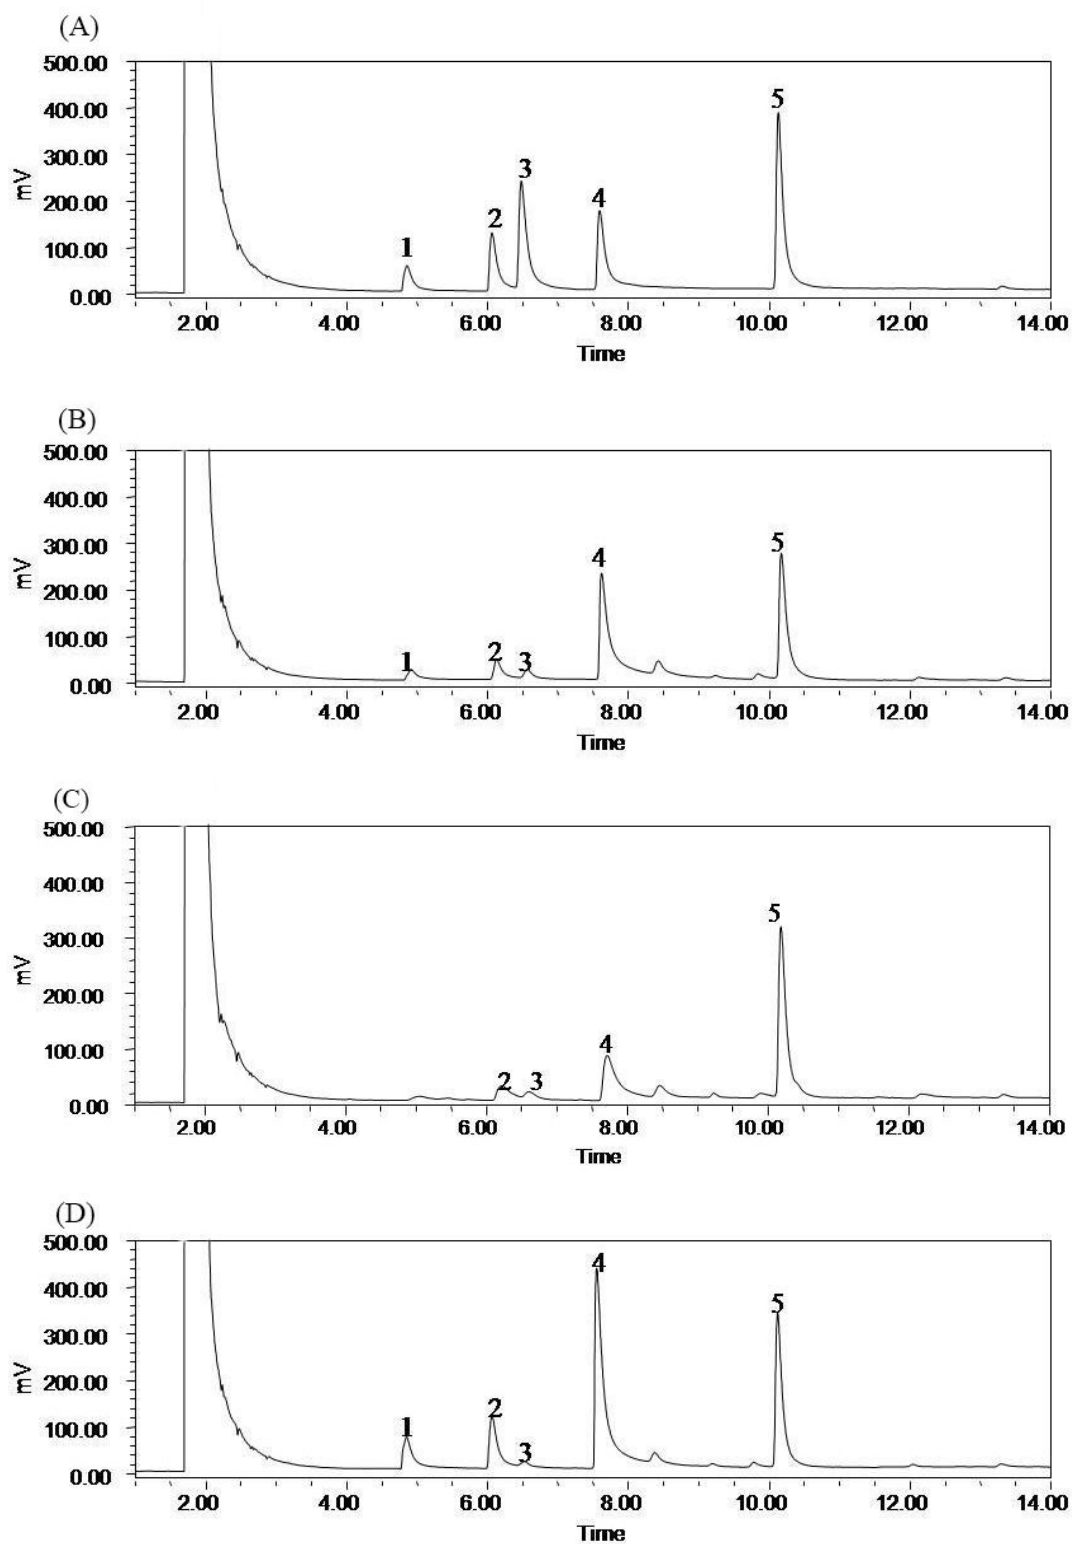

Supplement: 41598_2018_22094_MOESM1_ESM.pdf [file 41598_2018_22094_MOESM1_ESM.pdf]
